# Supplementary material for: Racism and health service utilisation: A systematic review and meta-analysis
Source: PubMed Central journal article supplement (PMC5734775; doi:10.1371/journal.pone.0189900), 2017-12-18
Supplement: pone.0189900.s001.pdf [file pone.0189900.s001.pdf]

**S1 Appendix. Search Strategy for MEDLINE (adapted for other databases as needed)**

**Search 1 terms:**

- 1 exp Prejudice/ or "racial discrimination".mp. or racism.mp. (21527)
  - 2 health services/ or "health care quality, access, and evaluation"/ (17306)
  - 3 professional-patient relations/ or trust/ (23223)
  - 4 Patient Satisfaction/ (49180)
  - 5 Physician-Patient Relations/ (54173)
  - 6 Health Behavior/ (26321)
  - 7 health behavior/ or patient compliance/ or medication adherence/ (69847)
  - 8 2 or 3 or 4 or 5 or 6 or 7 (201717)
  - 9 1 and 8 (1332)
  - 10 from 9 keep
- 7,13,30,39,45,88,95,115,136,141,143,152,183,189,256,260,279,281,402,409,411,428,  
444,467,481,499,510,526,539,546,552,565,588,634,663,723,811,862,1001 (39)

**Search 2 terms (Paradies et al., 2015):**

- 1 birth\* (ts)
- 2 gestation\* (ts)
- 3 health\* (ts)
- 4 well-being (ts )
- 5 wellbeing (ts)
- 6 disease\* (ts)
- 7 illness\* (ts)

- 8 BMI (ts)
- 9 “body mass index”(ts)
- 10 WHR (ts)
- 11 “waist hip ratio (ts)
- 12 anthropometric\* (ts)
- 13 “blood pressure” (ts)
- 14 hypertension (ts)
- 15 cardiovascular (ts)
- 16 overweight (ts)
- 17 obes\* (ts)
- 18 depressi\* (ts)
- 19 anxi\* (ts)
- 20 distress (ts)
- 21 stress (ts)
- 22 suicid\* (ts)
- 23 sleep\* (ts)
- 24 (social\* OR behav\* OR emotio\* OR develop\* OR psych\*) (AB) AND (difficul\*  
OR problem\* OR delay\* OR adjust\*) (ts)
- 25 self-esteem (ts)
- 26 “self esteem” (ts)
- 27 “life satisfaction” (ts B)
- 28 “quality of life” (ts B)
- 29 resilien\* (ts)
- 30 alcohol (ts)
- 31 tobacco (ts)

32 smok\* (ts)

33 “substance use” (ts)

34 drug\* (ts)

35 health (ts) AND (care OR service\* OR clinic\*) (ts)

36 Diseases (MESH)

37 Psychiatry (MESH)

38 Psychology (MESH)

39 1- 38 (OR)

40 ts=(discrim\* OR bias OR prejud\* OR hostil\* OR harass\* OR bully\* OR “unfair treat\*” OR oppress\*) OR mh=prejudice

41 ts=(rac\* OR ethnic\* OR cultur\* OR religio\* OR migra\* OR immigra\* OR refugee\*) OR mh=ethnic groups OR mh= minority groups

42 ts=(longit\* OR cohort\* OR trial\* OR “follow up” OR prospective OR retrospective OR “cross section\*” OR cross-section\* OR intervention\* or quantitative or survey\* OR “case-control” or “case control” or “randomised control\* trial\*” or “randomized control\* trial\*” or ”before and after” or “interrupted time series” or questionnaire\* or registr\* OR evaluat\* or audit\*) OR mh=Longitudinal Studies OR mh=Epidemiologic Research Design OR mh=Epidemiologic Study Characteristics as Topic or mh=registries

43 39 AND 40 AND 41 AND 42
